# Supplementary material
Source: bioRxiv or medRxiv preprint supplement (https://www.biorxiv.org/highwire/filestream/113677/field_highwire_adjunct_files/0/346635-1.pdf)
Supplement: Supplementary file [file 346635-1.pdf]

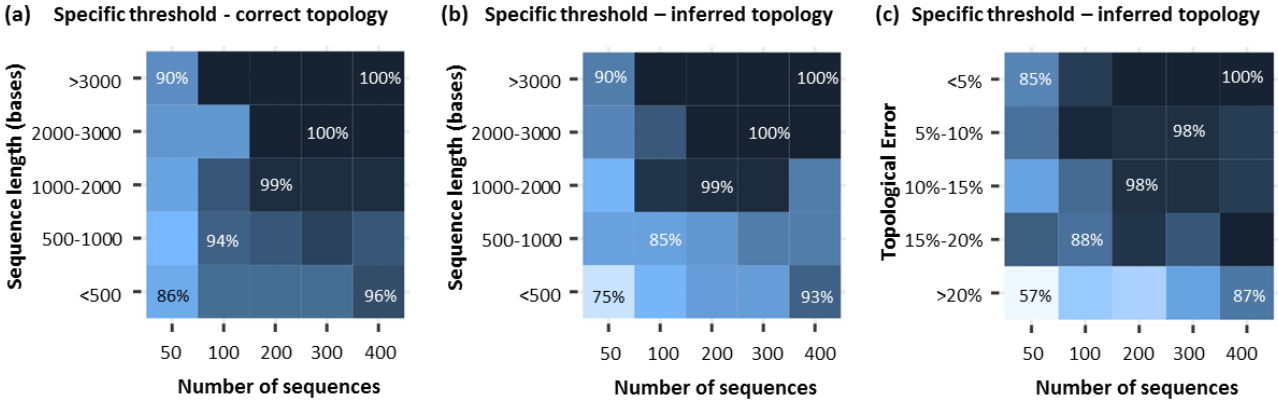

**Figure S1.** Patterns of CorrTest accuracy using M100, M200, M300, and M400 models for the corresponding test datasets (Tamura et al., 2012). Accuracies are shown for increasing number of sequences. The accuracy of CorrTest for different sequence length is shown when (a) the correct topology was assumed and (b) the topology was inferred. (c) The accuracy of CorrTest for datasets in which the inferred the topology contained small and large number of topological errors.
